# Supplementary material for: Electrode kinetics from a single experiment: multi-amplitude analysis in square-wave chronoamperometry
Source: Royal Society of Chemistry journal article supplement (doi:10.1039/d2cp01888h), 2022-01-01
Supplement: d2cp01888h1.pdf [file d2cp01888h1.pdf]

# Supporting Information

---

## Electrode kinetics from a single experiment: Multi-amplitude analysis in square-wave chronoamperometry

**Dariusz Guziejewski<sup>a\*</sup>, Leon Stojanov<sup>b</sup>, Zuzanna Zwierzak<sup>a</sup>, Richard G. Compton<sup>c</sup>,  
Valentin Mirceski<sup>a,b,d\*</sup>**

<sup>a</sup> *Department of Inorganic and Analytical Chemistry, University of Lodz, Tamka 12, 91-403 Lodz,  
Poland*

<sup>b</sup> *Institute of Chemistry, Faculty of Natural Sciences and Mathematics, "Ss Cyril and Methodius"  
University in Skopje, P.O. Box 162, 1000 Skopje, Republic of North Macedonia*

<sup>c</sup> *Department of Chemistry, Physical and Theoretical Chemistry Laboratory, Oxford University,  
South Parks Road, Oxford OX1 3QZ, Great Britain*

<sup>d</sup> *Macedonian Academy of Sciences and Arts, Bul. Krste Misirkov 2, 1000 Skopje, Republic of  
North Macedonia*

*E-mail: [dguziejewski@uni.lodz.pl](mailto:dguziejewski@uni.lodz.pl), [valentin@pmf.ukim.mk](mailto:valentin@pmf.ukim.mk);*

---

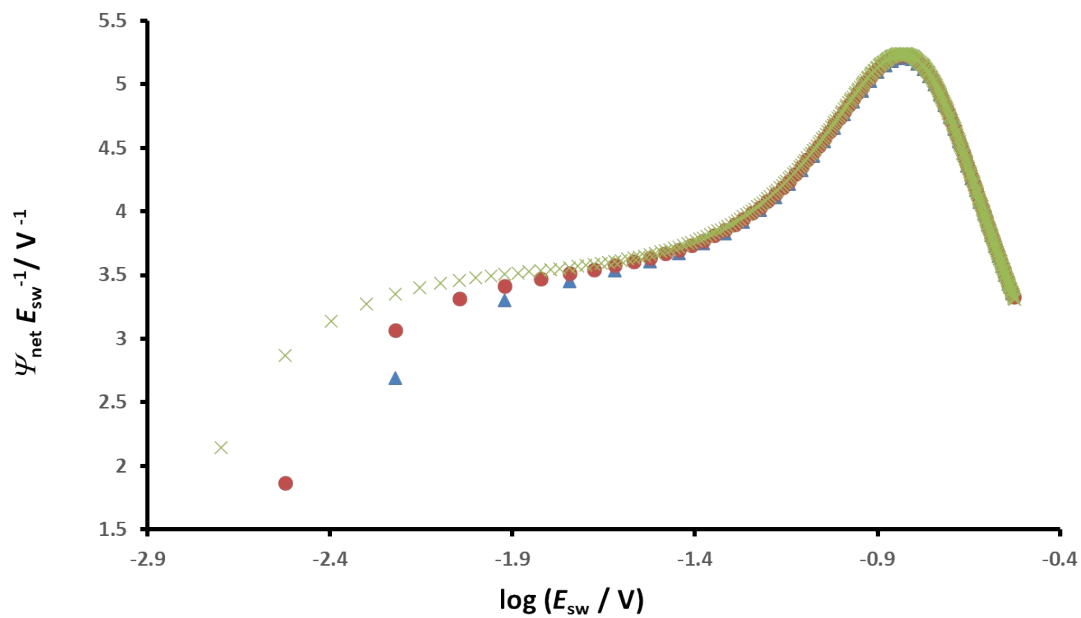

**Fig. S1.** Theoretical simulations in MA-SWCA for a quasireversible electrode reaction of a dissolved redox couple showing the effect of the amplitude increment in the amplitude-based quasireversible maximum. The values for the amplitude increment are:  $\Delta E_{\text{sw}} = 1$  mV (asterisks), 3 mV (circles) and 6 mV (triangles). The other conditions are identical as for Fig. 2 (A).

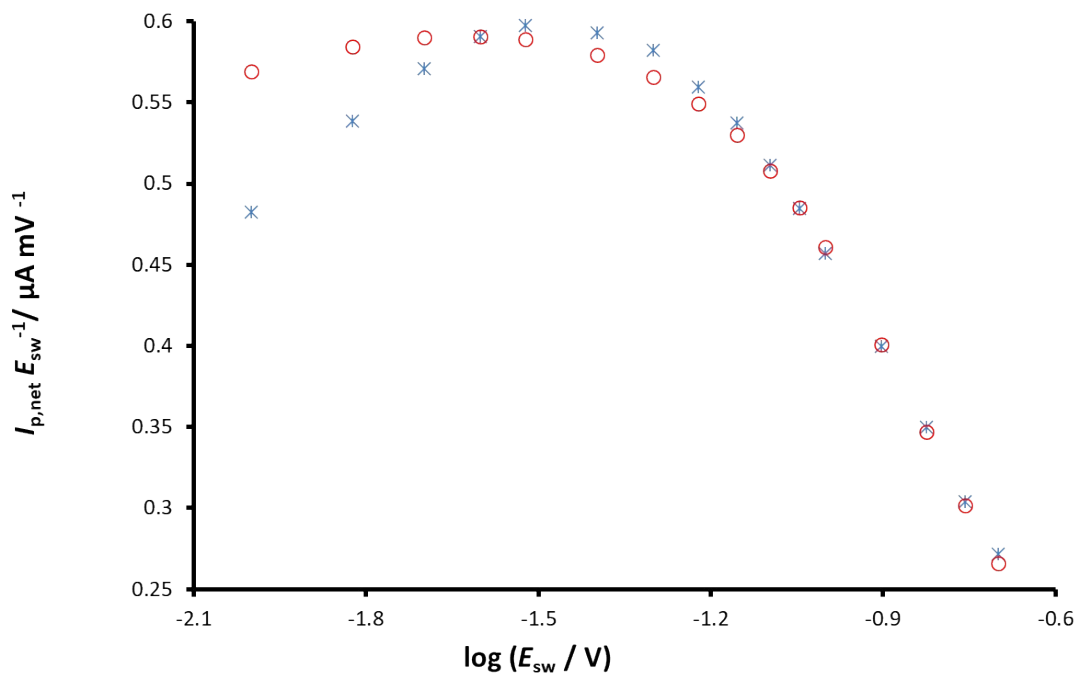

**Fig. S2.** Fitting of the theoretical and experimental data of the amplitude-based quasireversible maximum in SWV for a hexacyanoferrate redox system in 0.1 mol/L  $KNO_3$  supporting electrolyte at a glassy carbon electrode. Experimental (asterisks) and theoretical data (circles), simulated for the standard rate constant  $k_s = 5.0 \times 10^{-3} \text{ cm s}^{-1}$ ; diffusion coefficient  $D = 5 \times 10^{-6} \text{ cm}^2 \text{ s}^{-1}$ ; anodic electron transfer coefficient  $\alpha = 0.55$ ; amperometric constant  $A = 54 \text{ } \mu\text{A}$  ( $A = I / \Psi$ ), and temperature  $T = 291.15 \text{ K}$ . The other conditions for both theory and experiment are: frequency  $f = 25 \text{ Hz}$ ; bulk concentration of both  $[Fe(CN)_6]^{4-}$  and  $[Fe(CN)_6]^{3-}$  is  $c = 0.25 \text{ mmol/L}$  and the step potential increment  $\Delta E = 5 \text{ mV}$ .

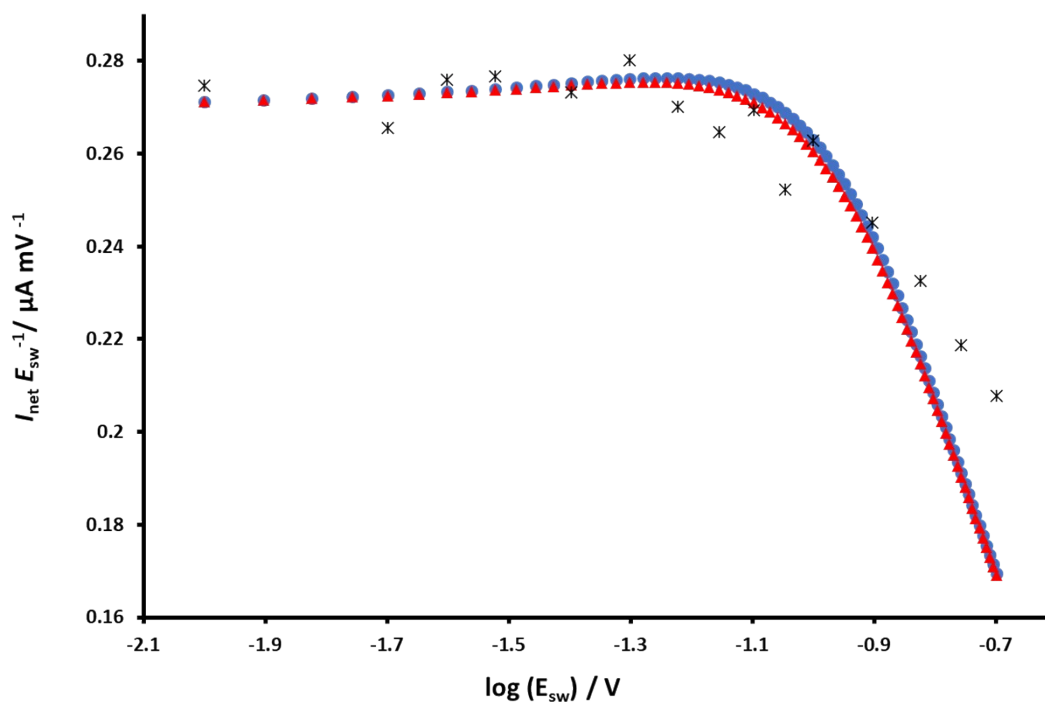

**Fig. S3.** Fitting of the theoretical (circles and triangles) and experimental data (asterisks) of the amplitude-based quasireversible maximum in MA-SWCA for a hexacyanoferrate redox system in 0.1 mol/L  $\text{KNO}_3$  supporting electrolyte at a glassy carbon electrode. Theoretical data are simulated for different anodic electron transfer coefficients  $\alpha = 0.45$  (red triangles) and  $\alpha = 0.50$  (blue circles), with the standard rate constant  $k_s = 3.0 \times 10^{-3} \text{ cm s}^{-1}$ , and amperometric constant  $A = 3,4 \times 10^{-5} \text{ A}$  (the values for  $\alpha = 0.55$  are virtually identical as for  $\alpha = 0.45$ ). The other conditions for both theory and experiment are identical as in Fig. S2.
